# Supplementary material for: Synthesis and (spectro)electrochemistry of mixed-valent diferrocenyl–dihydrothiopyran derivatives
Source: Royal Society of Chemistry journal article supplement (doi:10.1039/c5dt00246j), 2015-01-01
Supplement: c5dt00246j1.pdf [file c5dt00246j1.pdf]

## **Synthesis and (Spectro)Electrochemistry of Mixed-Valent Diferrocenyl- dihydrothiopyran Derivatives**

Konrad Kowalski,\*<sup>a</sup> Rafał Karpowicz,<sup>a</sup> Grzegorz Mlostoń,<sup>b</sup> Dominique Miesel,<sup>c</sup> Alexander Hildebrandt,<sup>c</sup> Heinrich Lang,<sup>c</sup> Rafał Czerwieniec,<sup>d</sup> Bruno Therrien<sup>e</sup>

<sup>a</sup>Faculty of Chemistry, Department of Organic Chemistry, University of Łódź, Tamka 12, PL-91403 Łódź, Poland

<sup>b</sup>Faculty of Chemistry, Department of Organic and Applied Chemistry, University of Łódź, Tamka 12, PL-91403 Łódź, Poland

<sup>c</sup>Technische Universität Chemnitz, Faculty of Natural Sciences, Institute of Chemistry, Inorganic Chemistry, D-09107 Chemnitz, Germany

<sup>d</sup>Universität Regensburg, Institut für Physikalische und Theoretische Chemie, Universitätsstraße 31, D-93040 Regensburg, Germany

<sup>e</sup>Institute of Chemistry, University of Neuchâtel, Avenue de Bellevaux 51, CH-2000 Neuchâtel, Switzerland

## Supplementary Information

## Contents

|                                                                                                |          |
|------------------------------------------------------------------------------------------------|----------|
| <b>Figure S1</b> <sup>1</sup> H-NMR spectrum of <b>1</b>                                       | <b>3</b> |
| <b>Figure S2</b> <sup>1</sup> H-NMR spectrum of <b>2</b>                                       | <b>4</b> |
| <b>Figure S3</b> <sup>1</sup> H-NMR spectrum of <b>2</b>                                       | <b>5</b> |
| <b>Figure S4</b> <sup>1</sup> H-NMR spectrum of <b>3</b>                                       | <b>6</b> |
| <b>Figure S5</b> UV-Vis/NIR spectra of <b>2</b> at 25 °C in acetonitrile                       | <b>7</b> |
| <b>Table S1</b> Crystallographic and structure refinement parameters for <b>1</b> and <b>3</b> | <b>8</b> |

Figure S1  $^1\text{H-NMR}$  spectrum of **1**

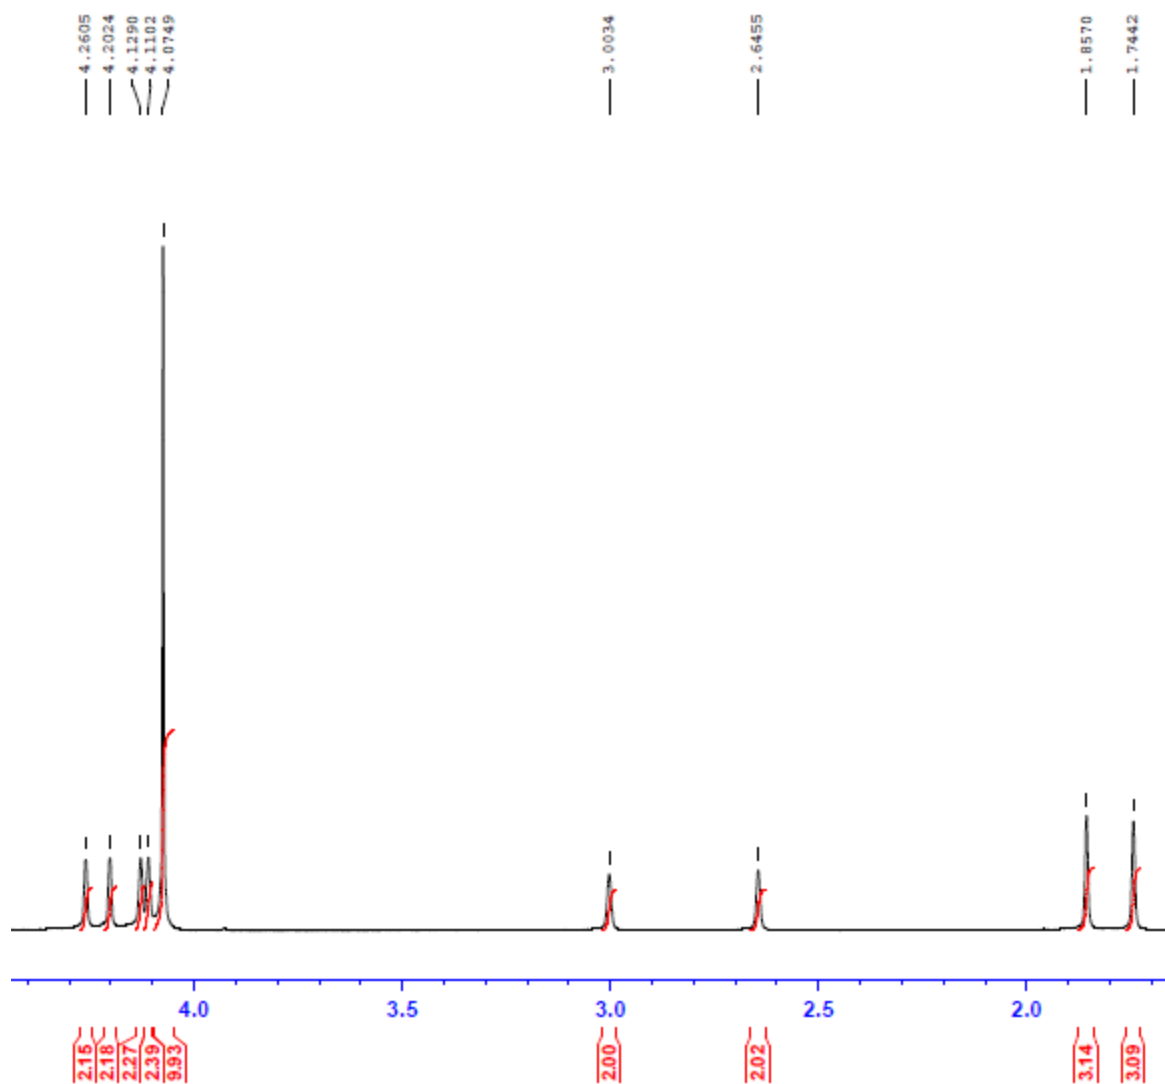

Figure S2 <sup>1</sup>H-NMR spectrum of 2

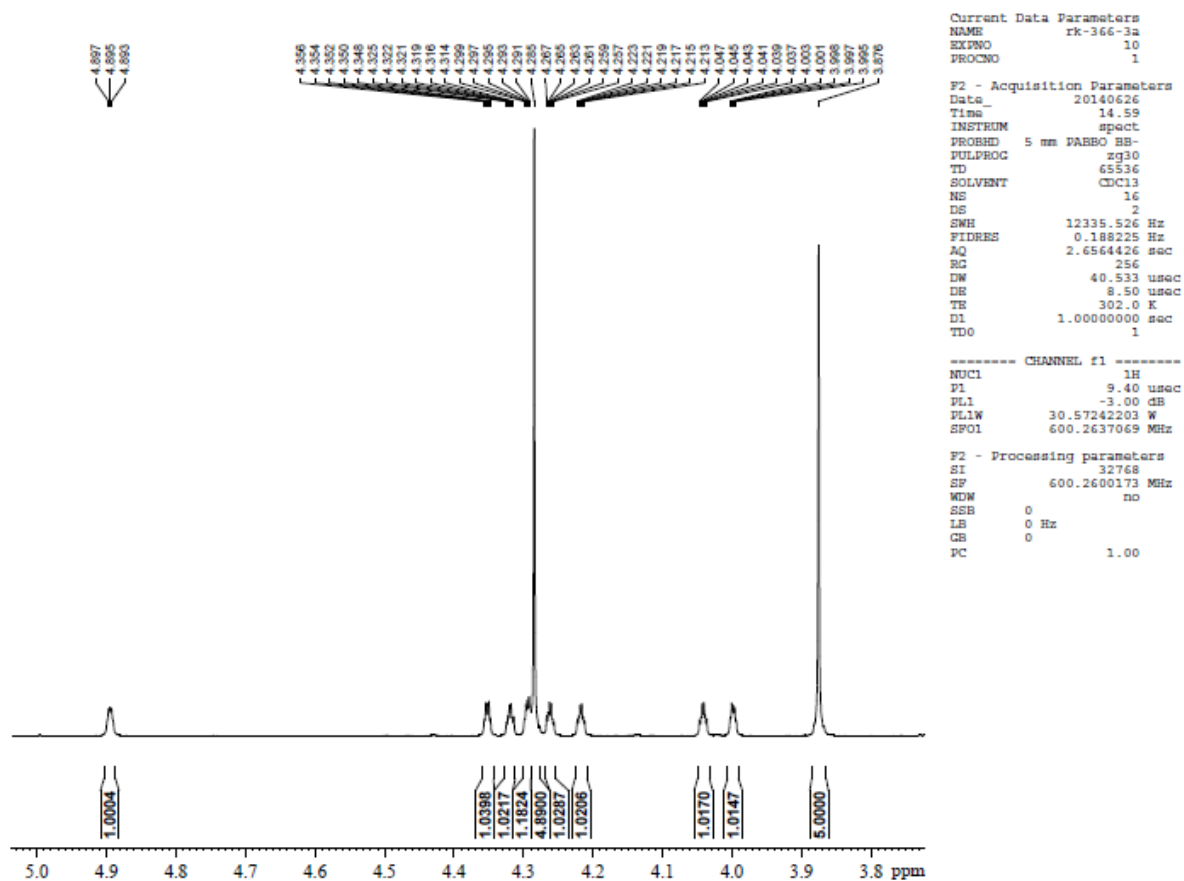

Figure S3  $^1\text{H-NMR}$  spectrum of **2**

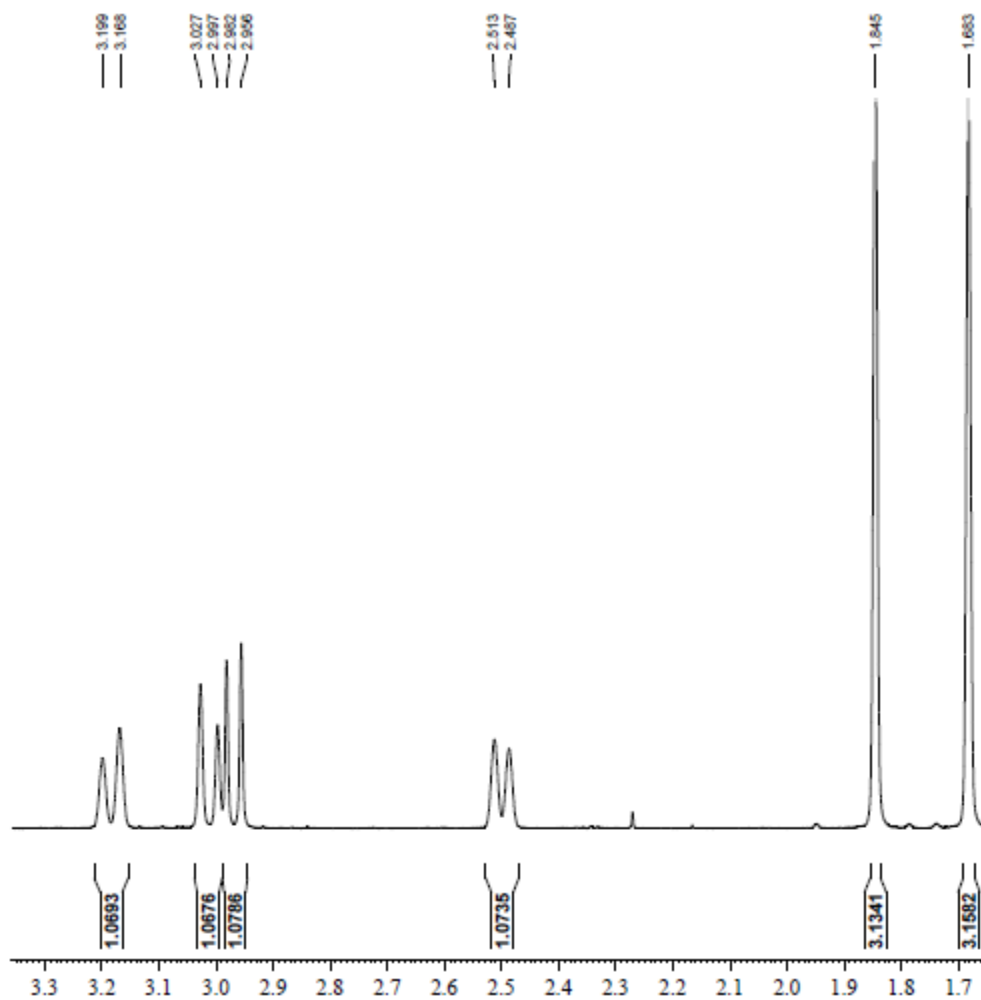

**Figure S4**  $^1\text{H-NMR}$  spectrum of **3**

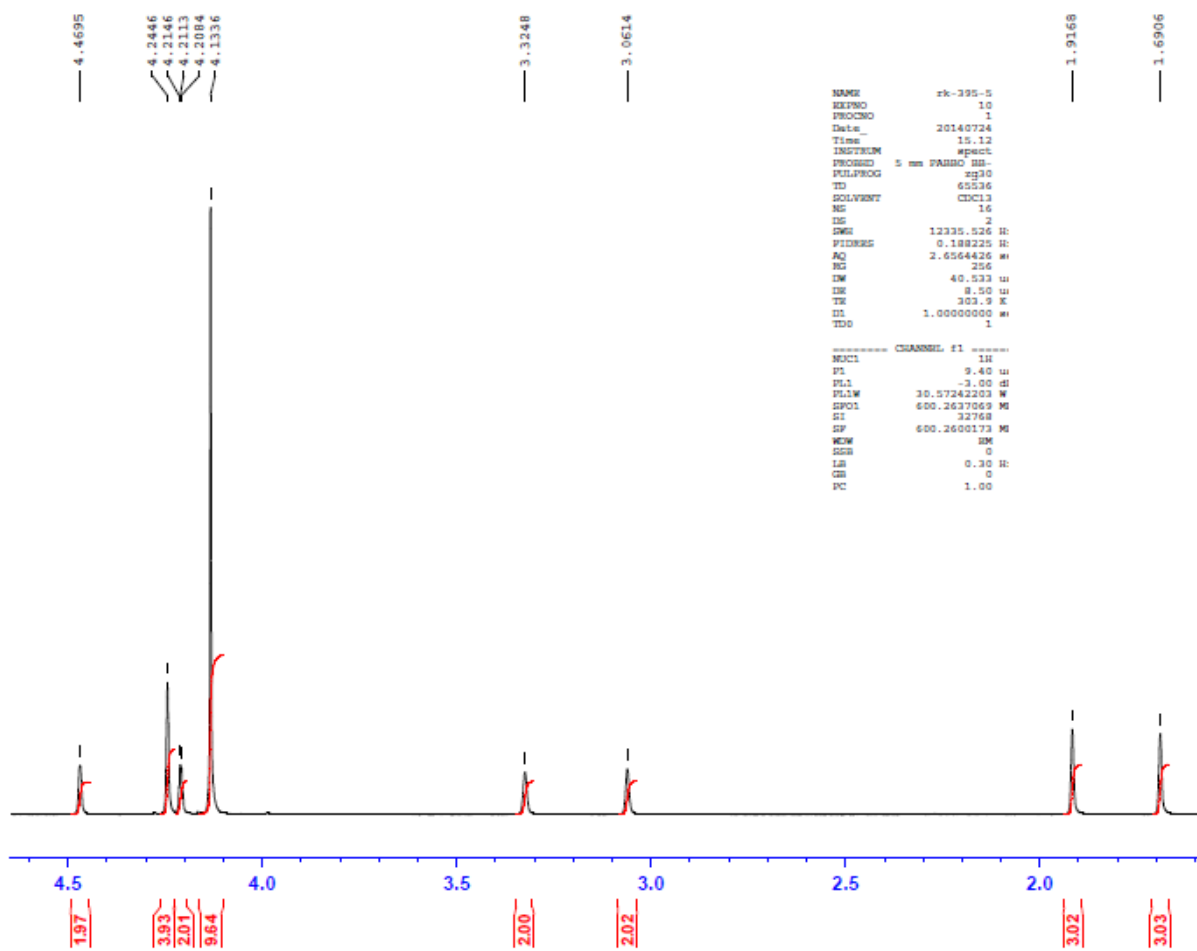

**Figure S5.** Left: UV-Vis/NIR spectra of **2** at 25 °C in acetonitrile (2.0 mmol·L<sup>-1</sup>) at rising potentials (bottom: -200 to 525 mV; top: 525 to 1200 mV vs Ag/AgCl); supporting electrolyte [Bu<sub>4</sub>N][B(C<sub>6</sub>F<sub>5</sub>)<sub>4</sub>]. Right: Deconvolution of the NIR absorptions of **2**<sup>+</sup> using three Gaussian shaped bands determined by spectroelectrochemistry in an OTTLE cell.

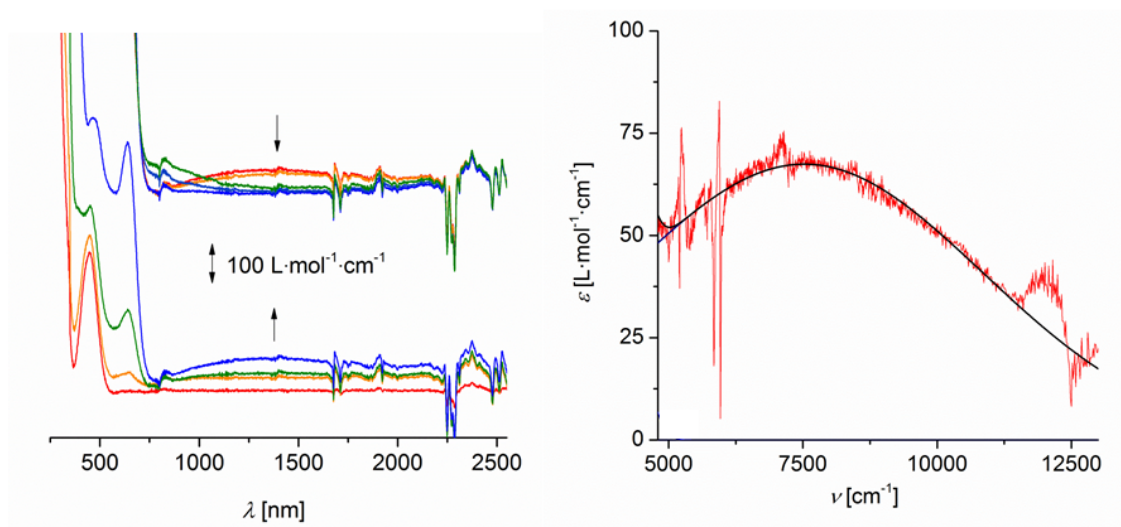

**Table S1.** Crystallographic and structure refinement parameters for **1** and **3**.

|                                                              | <b>1</b>                                          | <b>3</b>                                                         |
|--------------------------------------------------------------|---------------------------------------------------|------------------------------------------------------------------|
| Chemical formula                                             | C <sub>27</sub> H <sub>28</sub> Fe <sub>2</sub> S | C <sub>27</sub> H <sub>28</sub> Fe <sub>2</sub> O <sub>2</sub> S |
| Formula weight                                               | 496.25                                            | 528.25                                                           |
| Crystal system                                               | Orthorhombic                                      | Triclinic                                                        |
| Space group                                                  | <i>P cab</i> (no. 61)                             | <i>P</i> -1 (no. 2)                                              |
| Crystal color and shape                                      | red block                                         | red block                                                        |
| Crystal size                                                 | 0.18 x 0.18 x 0.16                                | 0.21 x 0.20 x 0.16                                               |
| <i>a</i> (Å)                                                 | 9.7243(7)                                         | 12.7358(10)                                                      |
| <i>b</i> (Å)                                                 | 13.7133(10)                                       | 14.2608(12)                                                      |
| <i>c</i> (Å)                                                 | 32.524(2)                                         | 14.4554(11)                                                      |
| $\alpha$ (°)                                                 |                                                   | 103.754(6)                                                       |
| $\beta$ (°)                                                  |                                                   | 115.357(6)                                                       |
| $\gamma$ (°)                                                 |                                                   | 92.709(6)                                                        |
| <i>V</i> (Å <sup>3</sup> )                                   | 4337.1(5)                                         | 2271.0(3)                                                        |
| <i>Z</i>                                                     | 8                                                 | 4                                                                |
| <i>T</i> (K)                                                 | 173(2)                                            | 173(2)                                                           |
| <i>D<sub>c</sub></i> (g·cm <sup>-3</sup> )                   | 1.520                                             | 1.545                                                            |
| $\mu$ (mm <sup>-1</sup> )                                    | 1.446                                             | 1.392                                                            |
| Scan range (°)                                               | 1.94 < $\theta$ < 29.23                           | 1.63 < $\theta$ < 29.28                                          |
| Unique reflections                                           | 5881                                              | 12288                                                            |
| Observed refls [ <i>I</i> >2 $\sigma$ ( <i>I</i> )]          | 2950                                              | 5481                                                             |
| <i>R</i> <sub>int</sub>                                      | 0.0908                                            | 0.1299                                                           |
| Final <i>R</i> indices [ <i>I</i> >2 $\sigma$ ( <i>I</i> )]* | 0.0288, <i>wR</i> <sub>2</sub> 0.0389             | 0.0430, <i>wR</i> <sub>2</sub> 0.0814                            |
| <i>R</i> indices (all data)                                  | 0.0835, <i>wR</i> <sub>2</sub> 0.0431             | 0.1122, <i>wR</i> <sub>2</sub> 0.0919                            |
| Goodness-of-fit                                              | 0.599                                             | 0.676                                                            |
| Max, Min $\Delta\rho/e$ (Å <sup>-3</sup> )                   | 0.319, -0.299                                     | 0.397, -0.415                                                    |

\* Structures were refined on  $F_0^2$ :  $wR_2 = [\sum[w(F_0^2 - F_c^2)^2] / \sum w(F_0^2)^2]^{1/2}$ , where  $w^{-1} = [\Sigma(F_0^2) + (aP)^2 + bP]$  and  $P = [\max(F_0^2, 0) + 2F_c^2]/3$
